# Supplementary material
Source: PubMed Central journal article supplement (PMC1636569)

**A Total Rear and Grooming Events per Trial**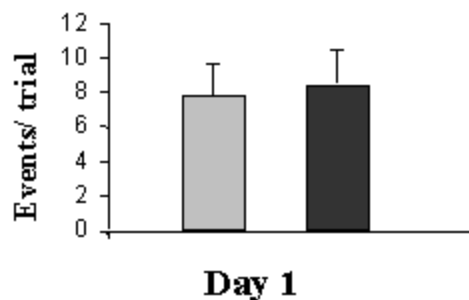**B**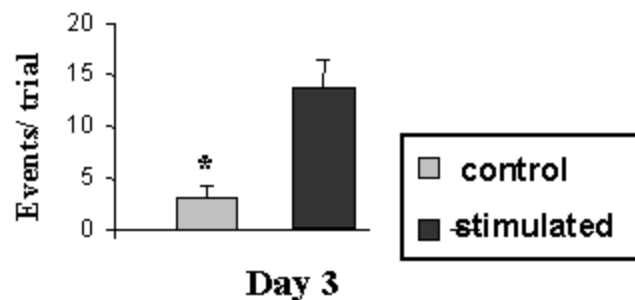**C Total Rear and Grooming Time per Trial**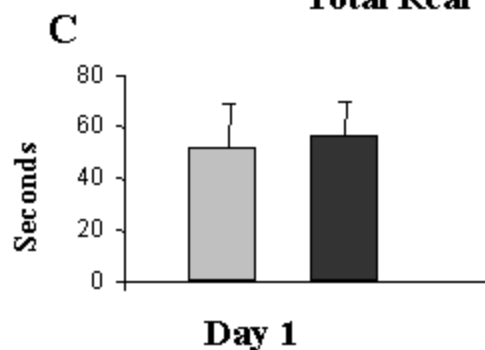**D**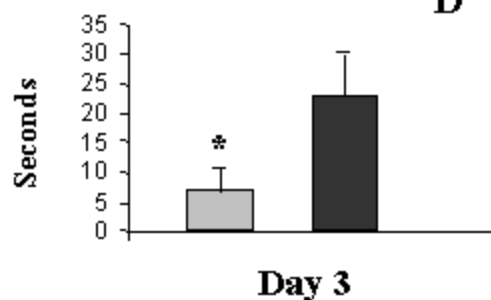**E Total Bars Crossed in Open Field**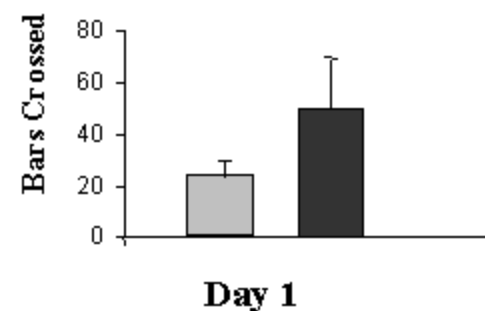**F**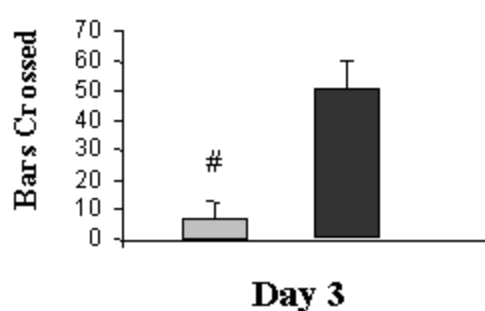

Supplement: pnas_0604811103_1.pdf [file pnas_0604811103_1.pdf]
